# Supplementary material
Source: ML conference proceedings conference paper supplement (https://openreview.net/forum?id=9ZDdlgH6O8)
Supplement: supplementary_material [file attachment]

---

# Supplementary for UltraEdit: Instruction-based Fine-Grained Image Editing at Scale

---

|    |                                                                                 |           |
|----|---------------------------------------------------------------------------------|-----------|
| 1  | <b>Contents</b>                                                                 |           |
| 2  | <b>A Implementation Details</b>                                                 | <b>3</b>  |
| 3  | A.1 Collection of High-Quality Image Caption Data . . . . .                     | 3         |
| 4  | A.2 Instruction and Caption Generation . . . . .                                | 3         |
| 5  | A.3 Region-based Data Generation . . . . .                                      | 3         |
| 6  | A.4 An Improved Baseline for Free-form and Region-based Image Editing . . . . . | 5         |
| 7  | <b>B Statistics of ULTRAEDIT</b>                                                | <b>6</b>  |
| 8  | B.1 Comparison with other dataset . . . . .                                     | 7         |
| 9  | B.2 More Examples of ULTRAEDIT . . . . .                                        | 8         |
| 10 | <b>C Baseline and Metrics</b>                                                   | <b>8</b>  |
| 11 | C.1 Baselines. . . . .                                                          | 8         |
| 12 | C.2 Details on Benchmarks and Metrics . . . . .                                 | 11        |
| 13 | <b>D Qualitative and Human Evaluations</b>                                      | <b>11</b> |
| 14 | D.1 Human Evaluation . . . . .                                                  | 11        |
| 15 | D.2 Qualitative Evaluation on Different Benchmarks . . . . .                    | 12        |
| 16 | D.3 Qualitative Evaluation on Real Image Anchors . . . . .                      | 12        |
| 17 | D.4 Qualitative Evaluation on Free-form vs. Region-based Editing . . . . .      | 13        |
| 18 | D.5 Details of the region-based image editing pipeline . . . . .                | 14        |
| 19 | <b>E Statement on Limitations and Ethical Concerns</b>                          | <b>19</b> |
| 20 | E.1 Limitations . . . . .                                                       | 19        |
| 21 | E.2 Ethical concerns . . . . .                                                  | 19        |
| 22 | <b>F Datasheet for ULTRAEDIT</b>                                                | <b>19</b> |
| 23 | F.1 Motivation . . . . .                                                        | 19        |
| 24 | F.2 Distribution . . . . .                                                      | 20        |

|    |                                  |    |
|----|----------------------------------|----|
| 25 | F.3 Maintenance . . . . .        | 20 |
| 26 | F.4 Composition . . . . .        | 20 |
| 27 | F.5 Collection Process . . . . . | 21 |
| 28 | F.6 Uses . . . . .               | 21 |

Table 1: Datasets used to form the high-quality image caption dataset.

| Dataset                   | #Samples  | License      | Annotator |
|---------------------------|-----------|--------------|-----------|
| MS COCO [15]              | 164,000   | CC BY 4.0    | Human     |
| Flickr [32]               | 31,783    | Custom       | Human     |
| NoCaps [1]                | 45,000    | CC BY 2.0    | Human     |
| VizWiz Caption [3]        | 23,431    | CC BY 4.0    | Human     |
| TextCaps [29]             | 28,408    | CC BY 4.0    | Human     |
| Localized Narratives [21] | 849,000   | CC BY 4.0    | Human     |
| ShareGPT4V [5]            | 1,200,000 | CC BY-NC 4.0 | GPT-4V    |
| LAION-LVIS [26]           | 220,000   | Apache-2.0   | GPT-4V    |

## 29 A Implementation Details

### 30 A.1 Collection of High-Quality Image Caption Data

31 To ensure the diversity and quality of the image editing pairs in ULTRAEDIT, our data generation  
 32 pipeline relies on high-quality oracle data to mitigate biases within the generation models. Conse-  
 33 quently, we focus on building the image editing dataset based on real images and their captions,  
 34 enhancing the dataset’s reliability in real-world scenarios and providing more comprehensive guidance  
 35 for data generation than text-only data.

36 Like previous works [13, 5, 33, 36], we gathered source data from various public data sources with  
 37 image caption data, as illustrated in Table 1, which includes diverse images with either manually  
 38 annotated captions or detailed captions generated by advanced image captioning models [5, 26]. After  
 39 filtering out images with excessively long or short captions, our collection amounted to 1.6 million  
 40 high-quality image-caption pairs, which will be used for edit instruction generation and subsequent  
 41 image generation.

### 42 A.2 Instruction and Caption Generation

43 To obtain high-quality editing instructions, we introduce a pipeline that combines human raters and  
 44 language models for generating edit instructions and corresponding captions for subsequent image  
 45 generation. Large language models have demonstrated remarkable abilities in various areas, such as  
 46 agents [7, 11, 28, 14] and tool uage [25]. In our practice, we utilize the LLM to generate suitable  
 47 image editing instructions. Firstly, we use language models to expand manually crafted edit examples  
 48 to a set of 100,000 examples, as shown in Table 2. These examples serve as in-context learning  
 49 examples to help the language models grasp the understanding of editing styles and requirements,  
 50 enabling them to generate suitable editing instructions and corresponding edited caption. The query  
 51 prompt is illustrated in Table 3.

52 We sample 50 editing instructions and 10 edit examples as in-context learning examples for query-  
 53 ing the language model. The language model then generates appropriate editing instructions and  
 54 corresponding edited captions for the given image captions from the collection. Leveraging the  
 55 in-context-learning capabilities and generalization ability of the language model, we ultimately gen-  
 56 erate 4.16 million text-only data comprising creative yet sensible edit instructions and corresponding  
 57 captions. Each case consists of a high-quality image caption for a real image, an editing instruction,  
 58 and an edited caption corresponding to a target image.

### 59 A.3 Region-based Data Generation

60 For generating region-based image editing data, we first employ the recognize-anything [35] to  
 61 identify objects in the source images. We then query the language model with the obtained object  
 62 lists, edit instructions, and corresponding image captions to determine the target objects of the editing  
 63 instruction using the query prompt in Table 4. If the editing instruction is object-oriented, the language  
 64 model identifies the objects involved in the editing; otherwise, the entire image is considered as the  
 65 editing target.

Table 2: Examples of instructions and their corresponding captions after Expansion.

| Original Caption                                                                                                   | Edit Instruction                                                                | Edited Caption                                                                                                                              |
|--------------------------------------------------------------------------------------------------------------------|---------------------------------------------------------------------------------|---------------------------------------------------------------------------------------------------------------------------------------------|
| Two Asian dolls with big noses, fancy purple dresses, and golden hats.                                             | Replace the dolls with miniature elephants in colorful traditional Indian cloth | Two miniature elephants wearing colorful traditional Indian cloth.                                                                          |
| A man is watching TV in bed with only his foot showing.                                                            | Remove the bed and place the man in a deserted beach scene.                     | A man is watching TV on a deserted island beach with only his foot showing.                                                                 |
| a person throwing a red frisbee, which is currently in mid-air, slightly to the right and above the person’s hand. | Change the color of the frisbee to blue                                         | a person throwing a blue frisbee, which is currently in mid-air, slightly to the right and above the person’s hand.                         |
| A slipper near the edge of a concrete floor near small rocks.                                                      | Transform the slipper into a glass one                                          | A glass slipper near the edge of a concrete floor near small rocks.                                                                         |
| A woman wearing a shirt for the Religious Coalition for Reproductive Choice.                                       | Change the background to a bustling cityscape at night                          | A woman wearing a shirt for the Religious Coalition for Reproductive Choice in front of a bustling cityscape at night.                      |
| A pot and some trays are in a kitchen.                                                                             | Add a warm, inviting atmosphere to the image                                    | The warm glow highlights a pot and some trays in a cozy kitchen.                                                                            |
| a person that is jumping his skateboard doing a trick.                                                             | Turn the skateboard into a flying carpet                                        | a person that is jumping his flying carpet doing a trick.                                                                                   |
| A stuffed bear is hanging on a fence.                                                                              | Make it a snowy winter landscape                                                | A stuffed bear is hanging on a snowy winter landscape fence.                                                                                |
| A police dog wearing his bullet proof vest.                                                                        | replace the background with a city skyline                                      | A police dog wearing his bullet proof vest in a city skyline.                                                                               |
| A baseball game is going with children playing a runner is about to hit the base.                                  | Turn the baseball field into a magical forest                                   | Children playing a runner is about to hit the base in a magical forest.                                                                     |
| A small horse carries a women in a sled.                                                                           | Turn the horse and sled into a spaceship traveling through outer space          | A futuristic spaceship travels through outer space.                                                                                         |
| a person wearing a life jacket participating in water sports like water skiing.                                    | Add a family of dolphins swimming around the person in the water                | a person wearing a life jacket participating in water sports like water skiing, with a family of dolphins swimming around him in the water. |

66 To generate region-based edited images, we use the Grounding DINO [16] to obtain bounding boxes  
67 of editing areas in real images, serving as coarse-grained masks. Subsequently, we perform SAM [12]  
68 on these bounding boxes to derive fine-grained object masks, expanding them to create contour masks  
69 that define the editing region. During image generation, we have observed irregular color boundaries  
70 between the editing region and the rest of the image. To ensure smooth transitions and high image  
71 quality, we fuse the fine-grained and bounding box masks to create a soft mask guiding the image  
72 generation. Specifically, for the editing region latent  $M_f$  and bounding box latent  $M_b$ , we fuse the  
73 two masks, making the region between them a soft mask region  $M_s$ . The generation pipeline can be  
74 formulated as follows:

$$z_{t-1} = \begin{cases} (1 - M_s) \cdot z_T + M_s \cdot DM(z_t) & \text{if } t \bmod 2 == 0 \\ DM(z_t) & \text{otherwise} \end{cases} \quad (1)$$

Table 3: Query prompts for LLMs to write edit instructions and corresponding captions.

| Prompt for Writing Edit Instruction |                                                                                                                                                                                                                                                                                                                                                                                                                                                                                                |
|-------------------------------------|------------------------------------------------------------------------------------------------------------------------------------------------------------------------------------------------------------------------------------------------------------------------------------------------------------------------------------------------------------------------------------------------------------------------------------------------------------------------------------------------|
| Element                             | Content                                                                                                                                                                                                                                                                                                                                                                                                                                                                                        |
| Intro                               | I will present a series of image editing instruction examples essential for mastering and understanding a variety of editing styles and requirements. Here are some sample instructions:                                                                                                                                                                                                                                                                                                       |
| Instruction Examples                | {instruction_str}                                                                                                                                                                                                                                                                                                                                                                                                                                                                              |
| Task Description                    | I will provide one image caption corresponding to a specific image. You are required to apply the learned editing techniques to form suitable, detailed, and accurate editing instructions for the image defined by the caption. Note that your editing instructions should be distinct from the examples provided. Then, produce a description corresponding to the revised image after applying the editing instruction. Only necessary amendments should be made for the new image caption. |
| Output Format                       | The output format should be "original image caption; edit instruction; new image caption". Maintain the given format for the result. Please ensure to deliver solely the result, without incorporating any additional titles.                                                                                                                                                                                                                                                                  |
| Image Caption                       | The image caption is: {caption}                                                                                                                                                                                                                                                                                                                                                                                                                                                                |
| Produce Instances                   | Produce three suitable instances based on the caption and return the list.                                                                                                                                                                                                                                                                                                                                                                                                                     |
| Examples                            | Here are some output examples for your reference: {example_str}                                                                                                                                                                                                                                                                                                                                                                                                                                |
| Response                            | Response:                                                                                                                                                                                                                                                                                                                                                                                                                                                                                      |

75 Additionally, we define  $M_s$  as:

$$M_s = \begin{cases} s & \text{for elements in } M_b \setminus M_f \\ M_f & \text{otherwise} \end{cases} \quad (2)$$

76 where  $M_f$  is the editing region latent,  $M_b$  is the bounding box latent, and  $s$  is the hyperparameter  
 77 that determines the inpainting rate. During the generation, During the generation, we set  $s$  to range  
 78 from 0.2 to 0.8.

#### 79 **A.4 An Improved Baseline for Free-form and Region-based Image Editing**

80 We fine-tune the Stable Diffusion 1.5 model [23] using the Diffusers library [31] with data from  
 81 ULTRAEDIT. We maintain the hyperparameters as set in Brooks et al. [4]. Specifically, we train  
 82 the model on  $8 \times 80\text{GB}$  NVIDIA A100 GPUs with a total batch size of 256. Following prior  
 83 works [4, 33], we use an image resolution of  $256 \times 256$  for training and  $512 \times 512$  for generation.

84 To incorporate additional guidance from region masks, we concatenate the latent of the Region Mask  
 85  $M_s$  with the noisy latent  $Z_T$  and the latent of the source image  $Z_I$  to form the input to the diffusion  
 86 model. We add four additional channels to the UNet of the diffusion model to accommodate the  
 87 latent of the region mask  $M_s$ . The weights of the UNet are initialized with the pretrained diffusion  
 88 model, while the extra eight channels (four for the source image latent  $Z_I$  and four for the mask  
 89 latent  $M_s$ ) in the convolutional layers of the diffusion UNet are randomly initialized. The model is  
 90 then trained using a mixture of free-form and region-based image editing data from ULTRAEDIT. For

Table 4: Query prompts for LLMs to capture objects that need editing.

| Prompt for Capturing Editing Object |                                                                                                                                                                                                                                                                                                                                                                                                                                                                                                                              |
|-------------------------------------|------------------------------------------------------------------------------------------------------------------------------------------------------------------------------------------------------------------------------------------------------------------------------------------------------------------------------------------------------------------------------------------------------------------------------------------------------------------------------------------------------------------------------|
| Element                             | Content                                                                                                                                                                                                                                                                                                                                                                                                                                                                                                                      |
| Intro                               | The following prompt provides an instruction for image editing, an original image caption, a revised image caption that reflects the given edit instruction, and a set of objects detected by an object detection algorithm.                                                                                                                                                                                                                                                                                                 |
| Edit Instruction                    | Edit Instruction: "{edit_instruction}"                                                                                                                                                                                                                                                                                                                                                                                                                                                                                       |
| Original Caption                    | Original Image Caption: "{input_text}"                                                                                                                                                                                                                                                                                                                                                                                                                                                                                       |
| Revised Caption                     | Revised Image Caption: "{output_text}"                                                                                                                                                                                                                                                                                                                                                                                                                                                                                       |
| Object List                         | Set of Objects Identified by the Recognition Model: {object_list}                                                                                                                                                                                                                                                                                                                                                                                                                                                            |
| Task Description                    | Your task is to identify the objects most likely to be modified based on the information provided above. Consider this from a comprehensive perspective; note that some objects might not be explicitly mentioned in the instructions or the Identified Objects list, but their appearance could still be affected. Please use precise words or phrases in your response.                                                                                                                                                    |
| Note                                | Note:<br>1. If you can't identify any specific edited object (e.g., a style transfer involving the entire image instead of a single object; add/move an object, which does not fit object-oriented editing instructions), please respond with "NONE".<br>2. Your response should exclusively identify the objects requiring edits, excluding any extra context or details.<br>3. Please list the objects to be edited, separating each one with a comma. The number of objects identified in the answer should not exceed 2. |
| Response                            | Response:                                                                                                                                                                                                                                                                                                                                                                                                                                                                                                                    |

91 free-form image editing data, the model takes a blank mask as input to implicitly indicate that the  
 92 editing should affect the entire image.

93 When training the model exclusively with Free-form Image Editing data, we strictly follow the  
 94 settings of Brooks et al. [4] without making any additional modifications.

95 **B Statistics of ULTRAEDIT**

Table 5: Statistics of Free-form and Region-based Image Editing Data. The table shows the instance numbers, number of unique instructions, and their respective proportions for different instruction types.

| Data Type    | Statistic      | Change  |         |         | Transform |         | Add     | Replace | Turn    | Others  | Total     |
|--------------|----------------|---------|---------|---------|-----------|---------|---------|---------|---------|---------|-----------|
|              |                | Color   | Global  | Local   | Global    | Local   |         |         |         |         |           |
| Free-form    | Inst. No.      | 111,563 | 204,294 | 500,108 | 150,851   | 597,165 | 909,065 | 683,529 | 490,219 | 353,289 | 4,000,083 |
|              | Proportion (%) | 2.79    | 5.11    | 12.50   | 3.77      | 14.93   | 22.73   | 17.09   | 12.26   | 8.83    | /         |
|              | Unique Inst.   | 27,436  | 24,020  | 92,891  | 26,587    | 117,063 | 114,647 | 133,222 | 102,280 | 86,180  | 724,326   |
|              | Proportion (%) | 3.79    | 3.32    | 12.82   | 3.67      | 16.16   | 15.83   | 18.39   | 14.12   | 11.90   | /         |
| Region-based | Inst. No.      | 2,912   | 3,515   | 15,774  | 2,796     | 21,807  | 11,918  | 25,749  | 16,628  | 7,080   | 108,179   |
|              | Proportion (%) | 2.69    | 3.25    | 14.58   | 2.58      | 20.16   | 11.02   | 23.80   | 15.37   | 6.54    | /         |
|              | Unique Inst.   | 1,056   | 727     | 5,032   | 762       | 6,835   | 3,201   | 8,064   | 5,256   | 2,620   | 33,553    |
|              | Proportion (%) | 3.15    | 2.17    | 15.00   | 2.27      | 20.37   | 9.54    | 24.03   | 15.66   | 7.81    | /         |

96 In this section, we dive into the characteristics and statistics of ULTRAEDIT. We present ULTRAEDIT,  
 97 a large-scale, diverse, and high-quality real-image-based image editing dataset designed to advance  
 98 the capabilities of image editing models. ULTRAEDIT comprises over 4,000,000 instruction-based

99 free-form image editing instances and 100,000 region-based image editing instances, making it the  
 100 largest open-source image editing dataset. Notably, it is also the first large-scale dataset focused on  
 101 region-based image editing. Table 5 illustrates the statistics of the image editing data in ULTRAEDIT.  
 102 It shows the numbers and proportions of the different instruction types and data types of ULTRAEDIT.  
 103 Moreover, the Figure 1 shows the distribution of keywords in the instructions of ULTRAEDIT for  
 104 various instruction types.

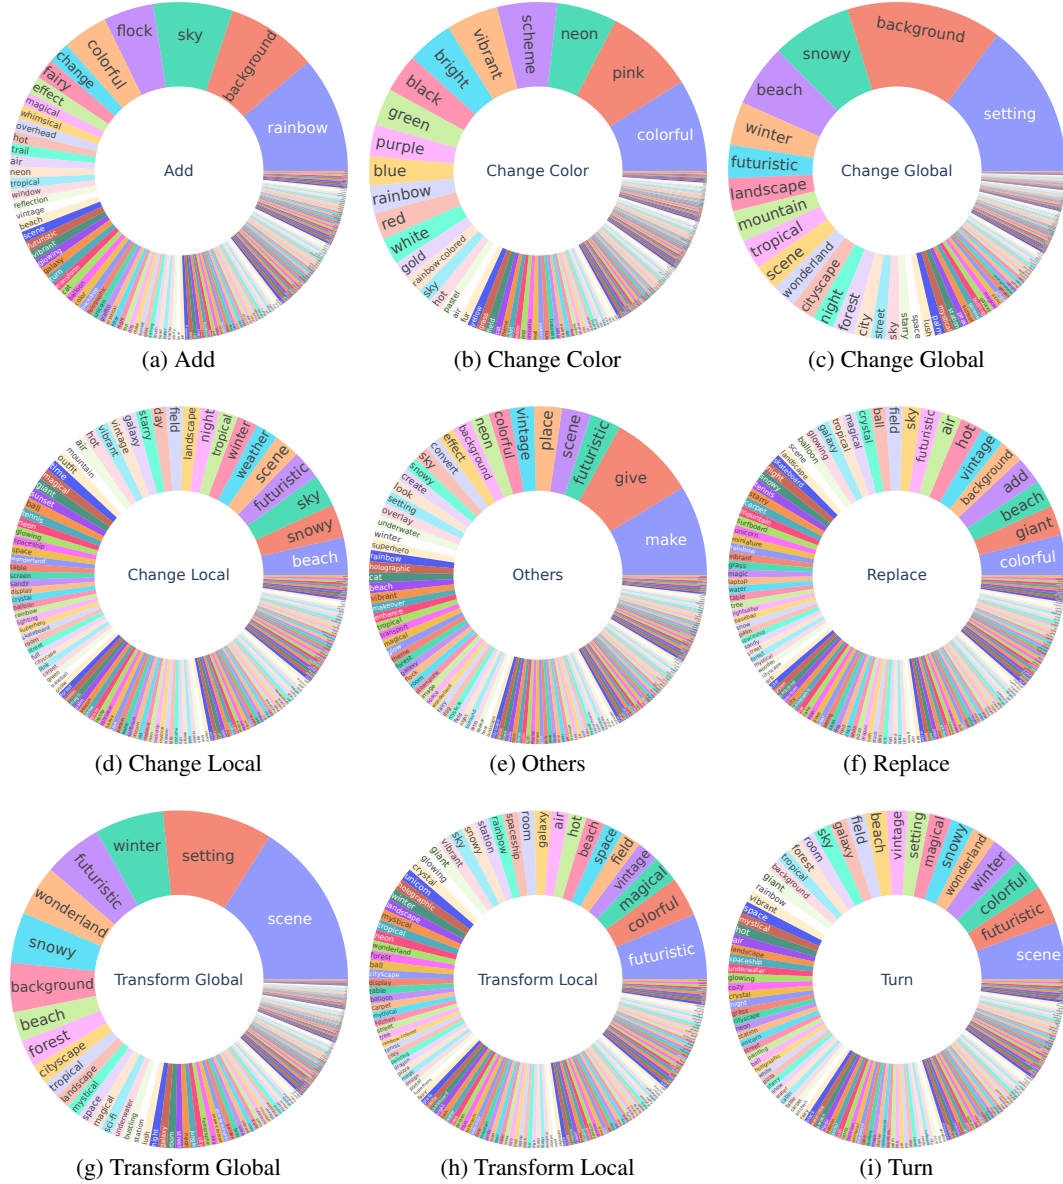

Figure 1: Distribution of keywords in the instructions of ULTRAEDIT for various instruction types

105 **B.1 Comparison with other dataset**

106 In this section, we compare our dataset with the InstructPix2Pix (IP2P) dataset in Free-form image  
 107 editing. We report the results of automatic metrics to evaluate the data quality of each dataset.

108 As illustrated in Table 6, our dataset outperforms the InstructPix2Pix (IP2P) dataset across all tasks.  
 109 Notably, the higher CLIPimg scores observed in some tasks for the IP2P dataset suggest that while  
 110 the image pairs in the dataset may exhibit semantic similarity, it does not achieve the desired visual

111 similarity, which is crucial for successful image editing. This highlights a fundamental shortcoming  
 112 in the IP2P dataset and underscores the superior of our dataset.

Table 6: Comparison of dataset quality between ULTRAEDIT and InstructPix2Pix (IP2P) using automatic metrics. We evaluate the data quality across different tasks types.

| Task      | Dataset | CLIPin | CLIPout | CLIPdir | CLIPimg | SSIM   | DINOv2 |
|-----------|---------|--------|---------|---------|---------|--------|--------|
| Change    | Ours    | 0.2849 | 0.3024  | 0.2967  | 0.8441  | 0.6360 | 0.7403 |
|           | IP2P    | 0.2667 | 0.2661  | 0.2317  | 0.8557  | 0.5685 | 0.6194 |
| Transform | Ours    | 0.2851 | 0.3005  | 0.2902  | 0.8289  | 0.6251 | 0.6875 |
|           | IP2P    | 0.2646 | 0.2680  | 0.1974  | 0.8667  | 0.5853 | 0.6972 |
| Turn      | Ours    | 0.2846 | 0.3018  | 0.2922  | 0.8321  | 0.6255 | 0.6949 |
|           | IP2P    | 0.2654 | 0.2698  | 0.2015  | 0.8575  | 0.5526 | 0.6419 |
| Add       | Ours    | 0.2786 | 0.3145  | 0.2957  | 0.8661  | 0.6645 | 0.7758 |
|           | IP2P    | 0.2629 | 0.2744  | 0.1990  | 0.8851  | 0.6318 | 0.7026 |
| Others    | Ours    | 0.2843 | 0.3038  | 0.2981  | 0.8374  | 0.6420 | 0.7048 |
|           | IP2P    | 0.2657 | 0.2706  | 0.1929  | 0.8629  | 0.5734 | 0.6847 |
| Overall   | Ours    | 0.2834 | 0.3049  | 0.2950  | 0.8427  | 0.6401 | 0.7231 |
|           | IP2P    | 0.2650 | 0.2694  | 0.1982  | 0.8660  | 0.5826 | 0.6859 |

## 113 B.2 More Examples of ULTRAEDIT

114 In this section, we showcase additional examples from ULTRAEDIT to illustrate the versatility and  
 115 robustness of our dataset in various image editing tasks. The free-form editing data is depicted in the  
 116 left two columns, while the region-based image editing data examples are in the right column. The  
 117 examples highlight both Free-form and Region-based editing capabilities. It can be noticed that, due  
 118 to using real images as anchors, our data shows high diversity in real-world scenarios, including text,  
 119 natural environments, human figures, abstract objects, and even blurred low-quality images.

120 In Figure 2 and Figure 3, editing examples not only contain text modification, and abstract object  
 121 editing, but also multi-step editing within a single instruction and fine-grained editing. Moreover,  
 122 because of high-quality captions derived from open-source image caption datasets for generating  
 123 editing instructions, the generated instructions are highly related to the source image. The region-  
 124 based image editing data demonstrates high image element preservation in the editing examples. For  
 125 instance, in the examples in the right column, the target images only perform edits within the masked  
 126 area and keep the rest unchanged, even for highly blurred texts and human facial expressions in the  
 127 figure.

## 128 C Baseline and Metrics

### 129 C.1 Baselines.

130 We set the following models as baselines, categorized into instruction-based image editing methods  
 131 and global description-guided image editing methods, the latter requiring global descriptions of the  
 132 target image to perform zero-shot editing. The instruction-based image editing methods include:  
 133 InstructPix2Pix [4], HIVE [34], MagicBrush [33], and Emu Edit [27]. The global description-guided  
 134 image editing methods include: Null Text Inversion [18], SD-SDEdit [17], GLIDE [19], and Blended  
 135 Diffusion [2]. Notably, GLIDE and Blended Diffusion require a mask for editing.

#### 136 Instruction-Based Methods:

- 137 • **InstructPix2Pix** uses automatically generated instruction-based image editing data to fine-  
 138 tuning Stable Diffusion [24] and performance image editing based on the instructions during  
 139 the inference, without any test-time tuning.



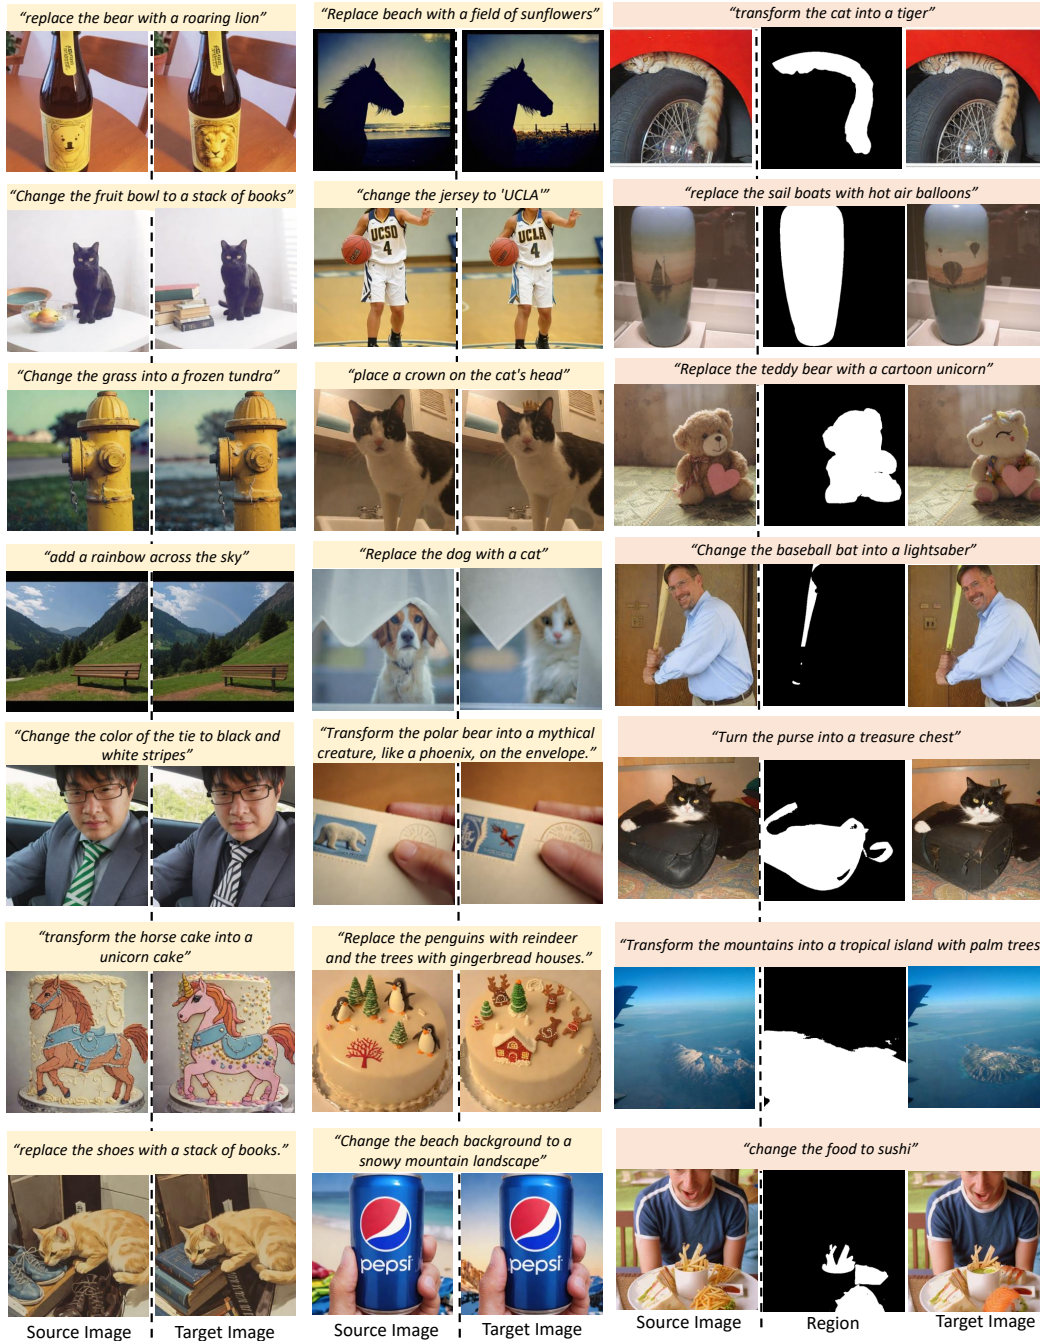

Figure 2: More Examples of ULTRAEDIT. Free-form (left) and region-based (right) image editing.

- 140 • **HIVE** is trained with more data similarly to InstructPix2Pix, and is further fine-tuned with a  
141 reward model trained on human-ranked data.
- 142 • **MagicBrush**: is a variant of InstructPix2Pix, which is fine-tuned on the human-annotated  
143 dataset, MagicBrush.
- 144 • **Emu Edit**: is a closed-source model that supports multi-task image editing and achieves  
145 state-of-the-art performance. It is trained on a diverse set of tasks using 10 million of training  
146 data, including image editing and computer vision tasks.

147 **Global Description-Guided Methods:**

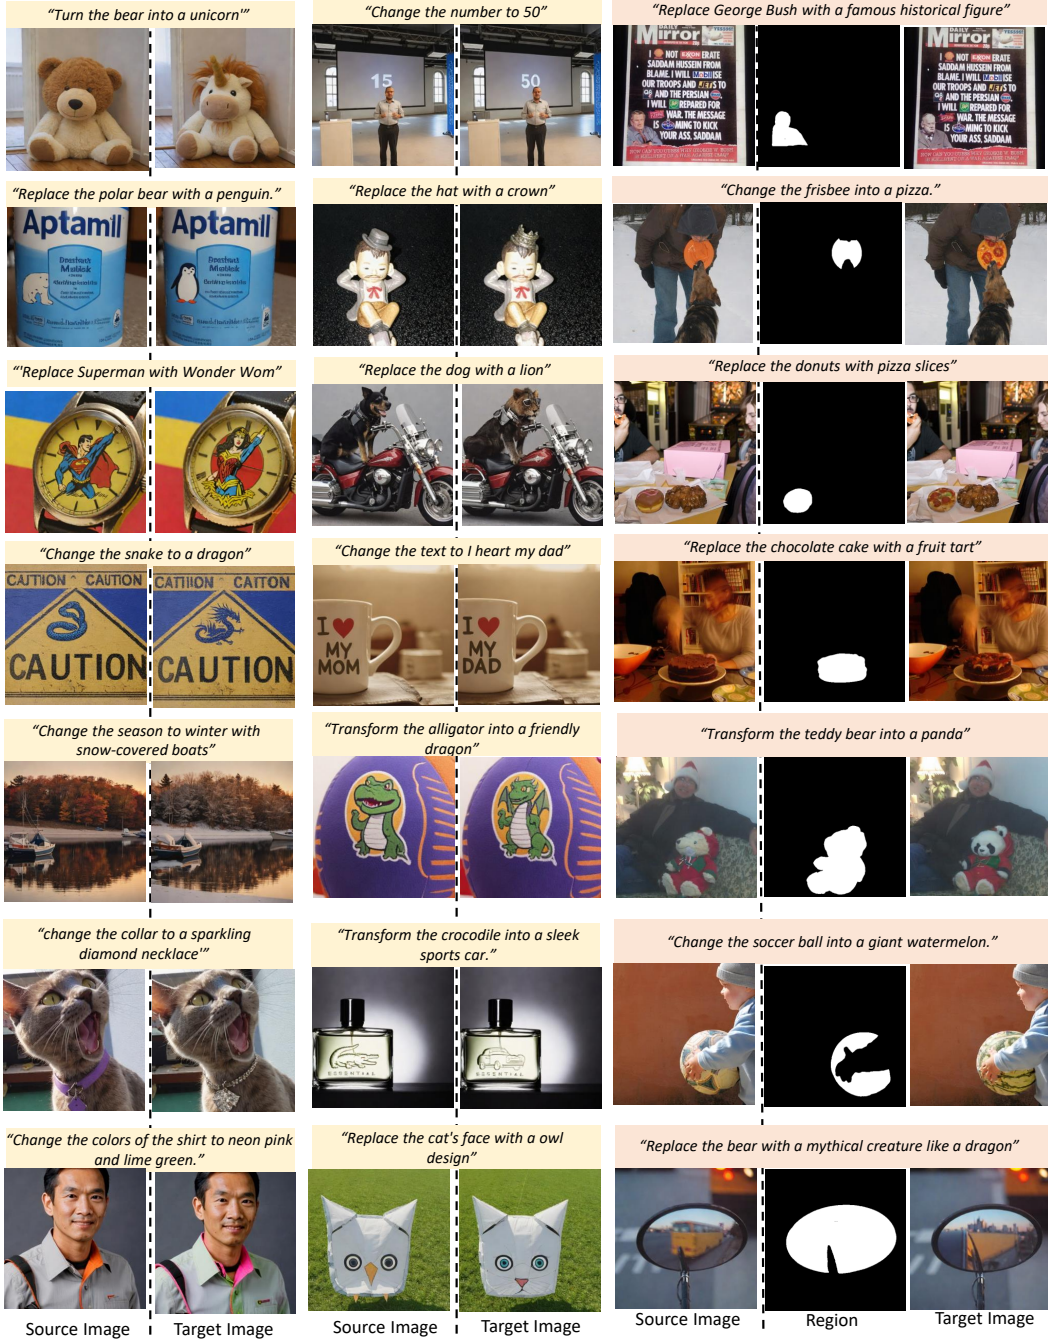

Figure 3: More Examples of ULTRAEDIT. Free-form (left) and region-based (right) image editing.

- 148 • **Null Text Inversion:** inverts the source image with DDIM [30] trajectory and then performs  
149 editing during the denoising process with text-image cross-attention control [10].
- 150 • **SD-SDEdit:** noises the guidance image to an intermediate diffusion step, and then denoises  
151 it using the target description.
- 152 • **GLIDE:** is trained with 67M text-image pairs to fill in the masked region of an image  
153 conditioned on the local description with CLIP guidance.
- 154 • **Blended Diffusion:** blends the input image in the unmasked regions with the context in the  
155 noisy source image during each denoising timestep to enhance region-context consistency.

## 156 C.2 Details on Benchmarks and Metrics

157 MagicBrush aims for evaluating the single and multi-turn image editing ability of the model. It  
158 provides annotator defined instructions and editing masks, as well as the ground truth images  
159 generated by DALLE-2 [22] for evaluation, allowing for more effective metric assessment of the  
160 model’s editing performance. However, this dataset also suffers from inherent bias. During data  
161 collection, annotators were directed to use the DALLE-2 image editing platform to generate the edited  
162 images. Thus, this benchmark is biased towards generated images and editing instructions that the  
163 DALLE-2 editor can successfully follow, which may compromise both its diversity and complexity.  
164 Following the setting of MagicBrush [33], we utilize L1 and L2 to measure the pixel-level difference  
165 between the generated image and ground truth image. And also adopts the CLIP similarity and DINO  
166 similarity to measure the overall similarity with the ground truth. Finally, the CLIP-T is used to  
167 measure the text-image alignment between local descriptions and generated images CLIP embedding.

168 Emu Edit Test aims for reducing bias of the annotator defined dataset and reach higher diversity. It  
169 contains the devise relevant, creative, and challenging instructions and high quality captions that  
170 capture both important elements in the image for source and target images, without any ground  
171 truth images. Consequently, consistent with the Emu Edit [27], we utilize the L1 distance, CLIP  
172 image similarity and DINO similarity between the **source images** and **edited images** to measure  
173 the the model’s ability of preserving elements from the source image. Also, we use the CLIP  
174 text-image similarity between edited image and output caption and the CLIP text-image direction  
175 similarity(CLIPdir) to measure the instruction following ability of the model. Specifically, the CLIPdir  
176 measures agreement between change in caption embedding and the change in image embedding. Since  
177 the Emu Edit [27] does not specify the versions of the CLIP and DINO models used for the metric,  
178 we adopted the settings utilized by MagicBrush to maintain alignment with other benchmarks.  
179 Specifically, the versions are ViT-B/32 for CLIP and dino\_vits16 for DINO embeddings. We  
180 ensure consistency by rerunning all results of different methods on Emu Edit benchmark. Additionally,  
181 there are known issues with the quality of the benchmark, wherein some image-caption pairs appear  
182 incorrect. These issues include placeholder captions (e.g., 'a train station in city') or instances where  
183 source and target captions are identical. To address these problems, we simply remove the incorrect  
184 cases prior to evaluation. Despite the Emu Edit Test eliminating bias and overfitting at the image level  
185 by not providing ground-truth images, the evaluation metrics still implicitly measure the model’s  
186 editing ability.

## 187 D Qualitative and Human Evaluations

### 188 D.1 Human Evaluation

189 We conducted human evaluations to assess the consistency, instruction alignment, and image qual-  
190 ity of the edited images generated by our model trained on ULTRAEDIT using the MagicBrush  
191 benchmark and Emu test benchmark. We first compared the performance of our model with the  
192 MagicBrush [33] and instructPix2Pix [4] models through a comprehensive human evaluation on  
193 MagicBrush benchmark. Additionally, we compared the performance of various models trained using  
194 our dataset with Emu Edit [27] on the Emu test benchmark. For the two evaluations, we randomly  
195 sampled 500 examples from the test sets of the MagicBrush benchmark and the Emu test benchmark,  
196 respectively.

197 For each sample, the evaluators compared the consistency, instruction alignment, and image quality of  
198 the edited images generated by the different models. As shown in Figure 4, the evaluators were asked  
199 to determine which edited image was better by selecting between "First Image", "Second Image", or  
200 "Tie". The results are evaluated with TrueSkill [9] rating system. The scores of these evaluations  
201 are presented in Table 7 and Table 8. Our model (finetuned with our own ULTRAEDIT) can produce  
202 more preferable editing results than the baselines, even better than the MagicBrush baseline, which is  
203 reported to overfit on its test set.

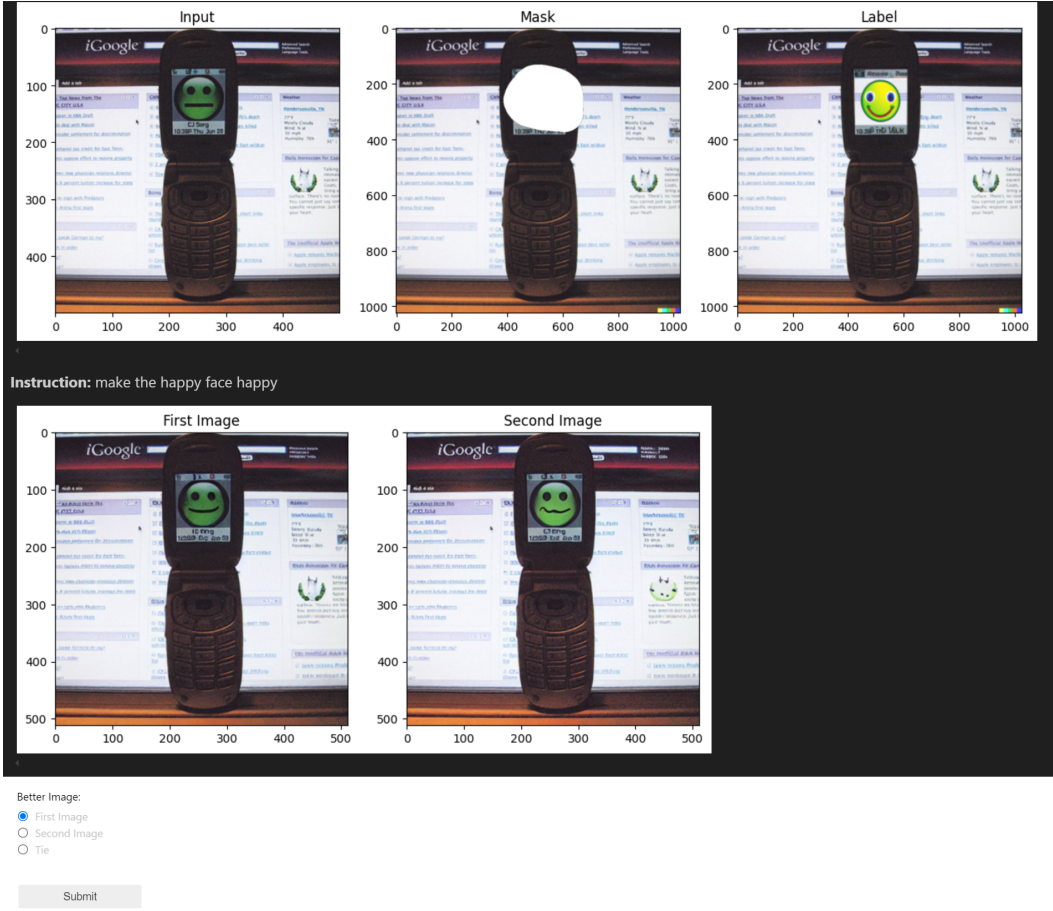

Figure 4: The interface of human evaluation on MagicBrush [33] and Emu test [27] benchmark to evaluate generated images by different models.

|                 | Ours w/ ULTRAEDIT | MagicBrush [33] | InstructPix2Pix [4] |
|-----------------|-------------------|-----------------|---------------------|
| TrueSkill score | $25.5 \pm 0.8$    | $23.7 \pm 0.7$  | $22.6 \pm 0.7$      |

Table 7: TrueSkill [9] scores of image editing models evaluated by human raters on MagicBrush [33] test set.

## 204 D.2 Qualitative Evaluation on Different Benchmarks

205 In Figure 5 and Figure 6, we present the qualitative examples of different editing tasks on single-turn  
 206 and multi-turn editing on MagicBrush. In Figure 7, we present the qualitative examples on Emu Edit  
 207 Test across various editing tasks.

## 208 D.3 Qualitative Evaluation on Real Image Anchors

209 In Figure 8, we present qualitative results comparing the image editing generation method with and  
 210 without using real images as anchors. Using real images as anchors to guide the data generation  
 211 significantly enhances the diversity of the generated images and ensures that the generation results  
 212 are more stable and aligned with the editing instructions. The image anchors provide substantial  
 213 information for generation that goes beyond what is conveyed by the image captions alone. Specifi-  
 214 cally, image anchor ensures visual consistency between the generated source and target images in the  
 215 image editing pairs, as shown in the first three rows of Figure 8. It can also be observed that with real

|                 | SD3 [6]<br>w/ ULTRAEDIT | SDXL [20]<br>w/ ULTRAEDIT | SD1.5 [24]<br>w/ ULTRAEDIT | Emu Edit [27] |
|-----------------|-------------------------|---------------------------|----------------------------|---------------|
| TrueSkill score | 26.7 ± 0.7              | 26.5 ± 0.7                | 26.0 ± 0.7                 | 25.1 ± 0.7    |

Table 8: TrueSkill [9] scores of image editing models evaluated by human raters on Emu Test [27] test set.

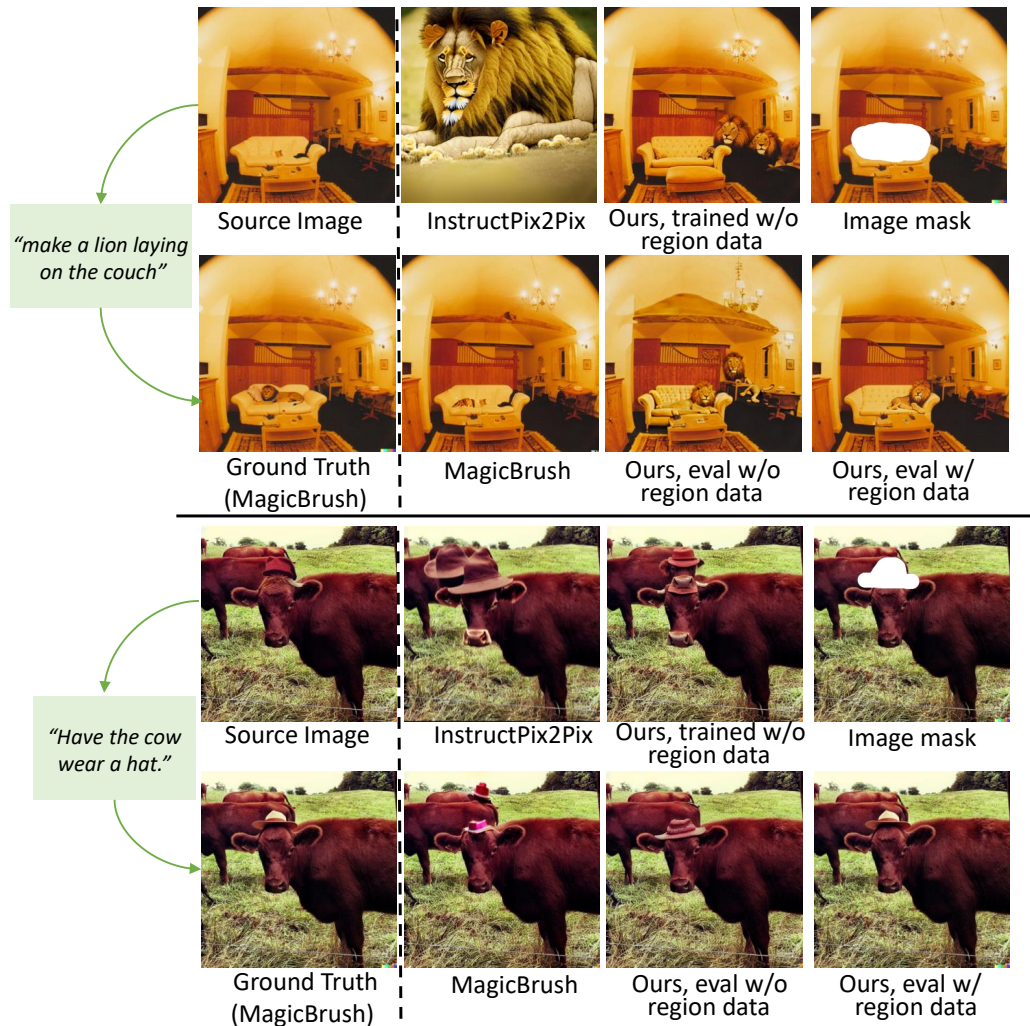

Figure 5: Qualitative evaluation of the model trained on ULTRAEDIT across MagrichBrush benchmark in the Single-turn Setting.

216 image anchors, the editing process is more controlled, resulting in fine-grained image edits in the  
 217 generated samples (see the last three rows in Figure 8).

#### 218 D.4 Qualitative Evaluation on Free-form vs. Region-based Editing

219 In Figure 9, we present qualitative results comparing the model trained with an additional region-  
 220 based editing task against the model trained solely with free-form image editing data. The comparison  
 221 highlights that the inclusion of the region-based editing task during training enables the model to  
 222 perform significantly more precise operations even in the absence of region input during evaluation,  
 223 especially for background and localized edits.

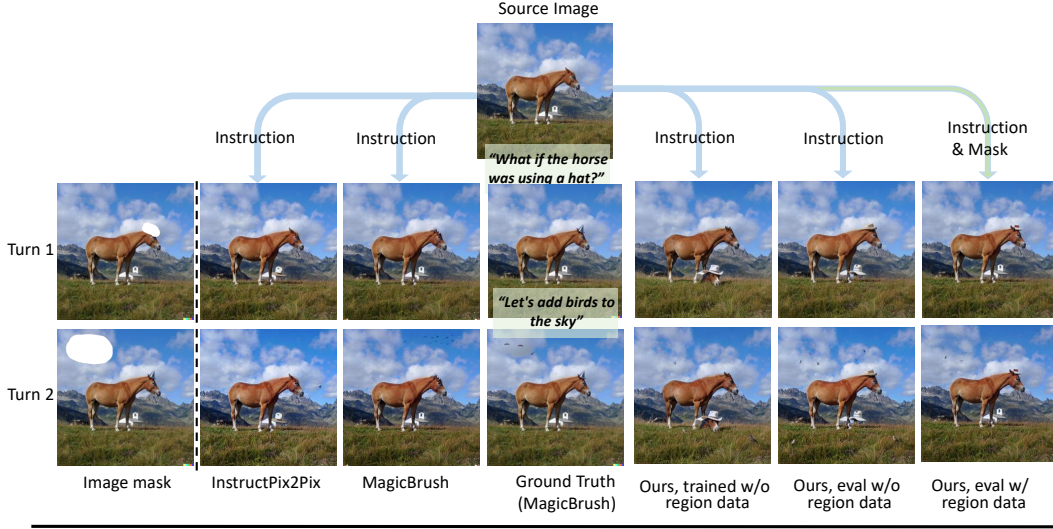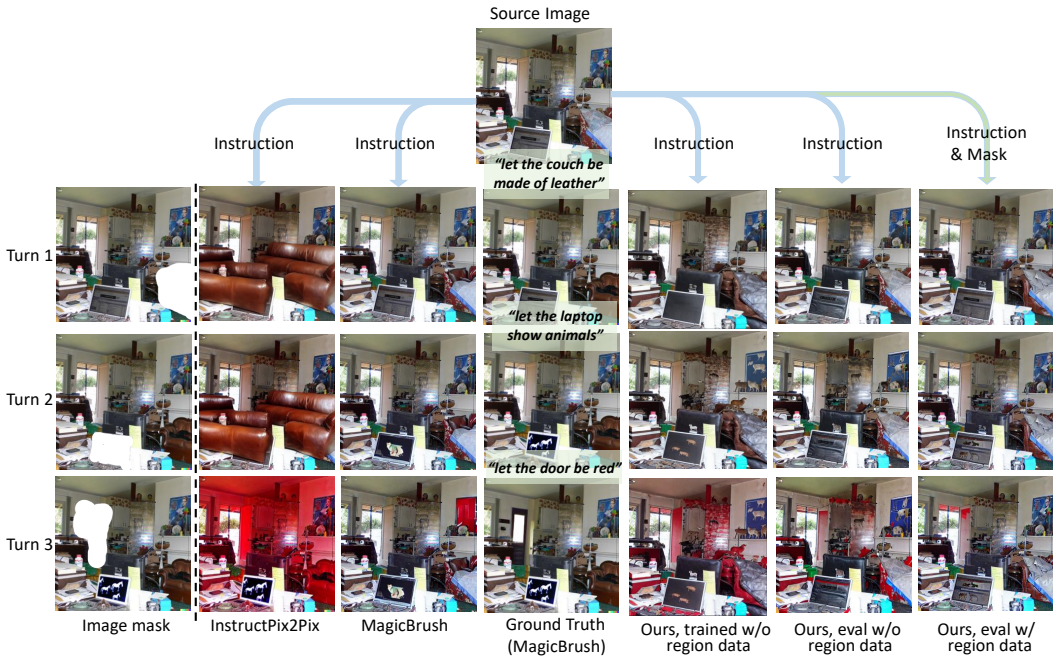

Figure 6: Qualitative evaluation of the model trained on ULTRAEDIT across MagrichBrush benchmark in the Multi-turn Setting.

## 224 D.5 Details of the region-based image editing pipeline

225 In Stage III, we apply our proposed method for generating region-based images to ensure a seamless  
 226 transition between inpainted areas and the rest of the image. Initially, we analyze inaccurate masks  
 227 generated by the segmentation model, as shown in Figure 11. We find these inaccuracies generally  
 228 fall into a few categories: incorrect identification resulting in overly large masks, masks that are too  
 229 small for effective editing, fragmented masks from segmentation failures, and fine-grained segment  
 230 masks that closely resemble the original object, complicating the editing process.

231 To address these issues, we filter out excessively large, small, or fragmented masks. Fine-grained  
 232 masks are adjusted using a soft mask, either a bounding box or contour mask. Our data circulation  
 233 indicates that our methods significantly reduce artifacts and abrupt boundaries between the mask

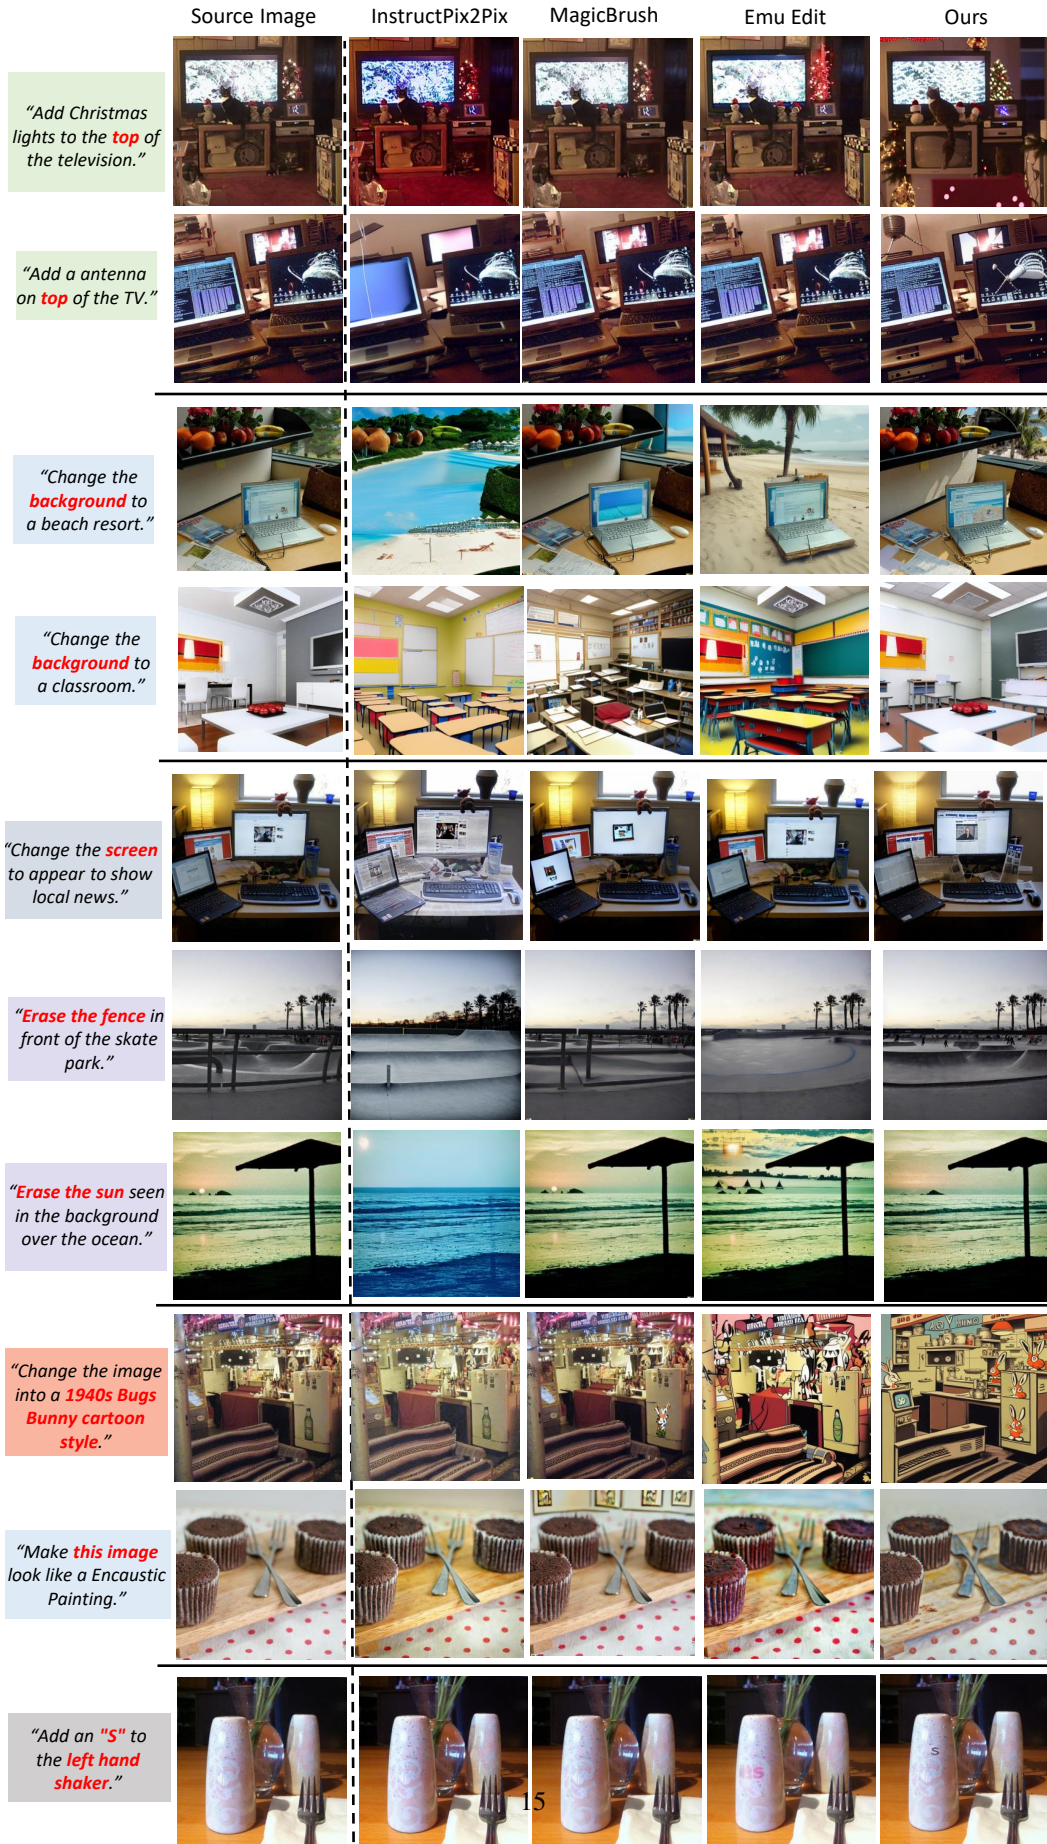

Figure 7: Qualitative evaluation of the model trained with ULTRAEDIT on the Emu Test.

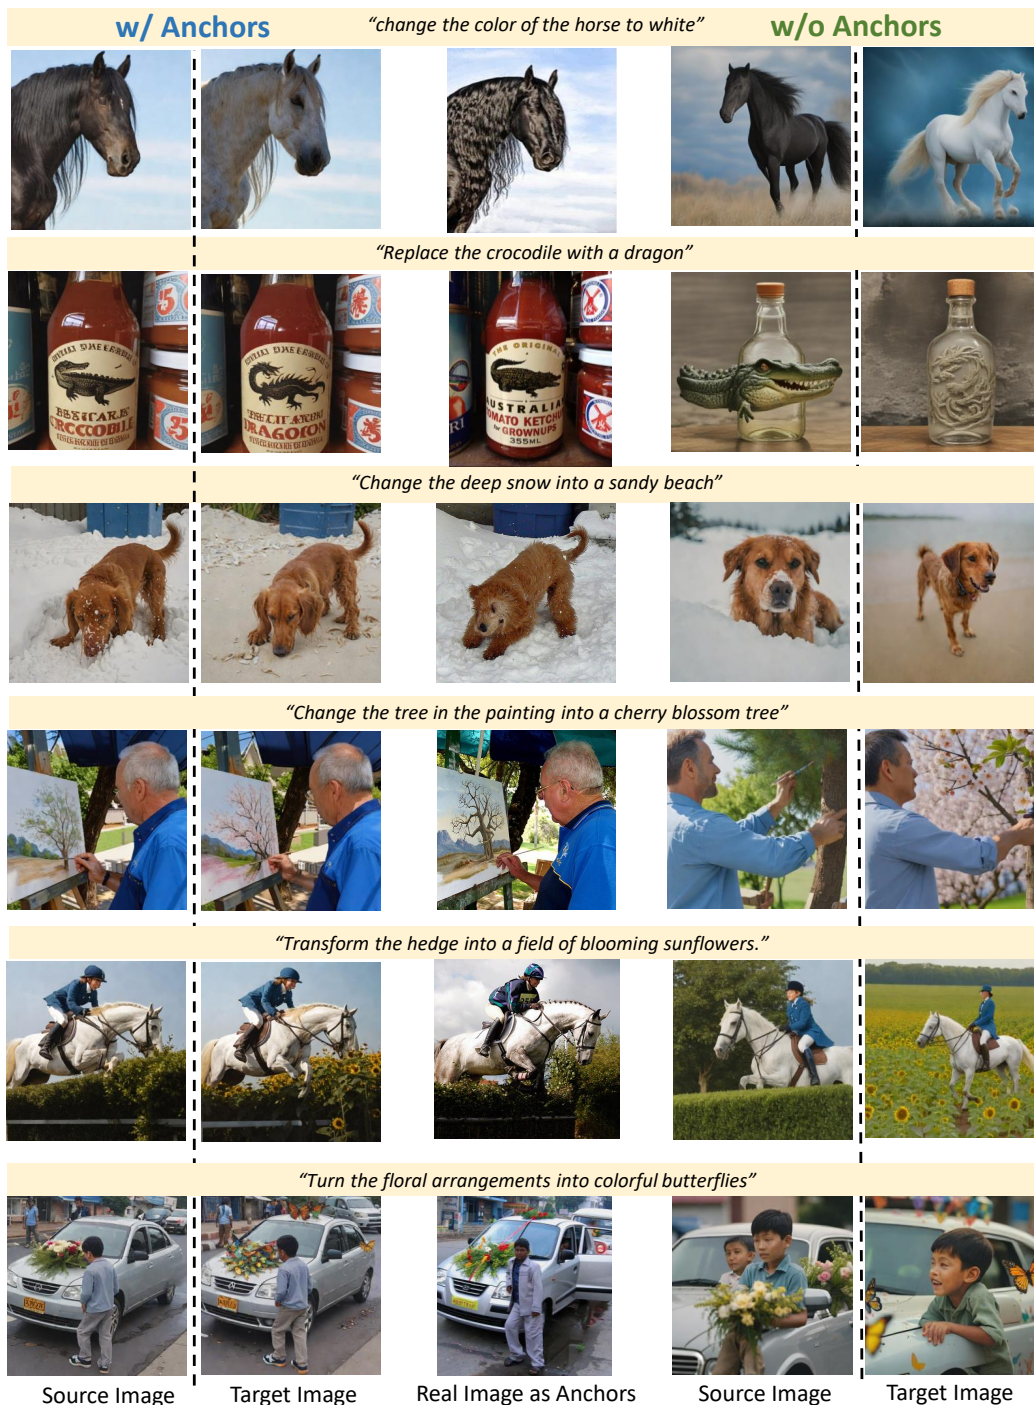

Figure 8: Qualitative evaluation of using real images as anchors during image generation. We compare qualitative examples between the generation pipeline using real image anchors (left) and the generation pipeline without real image anchors (right). The real images are presented in the middle column.



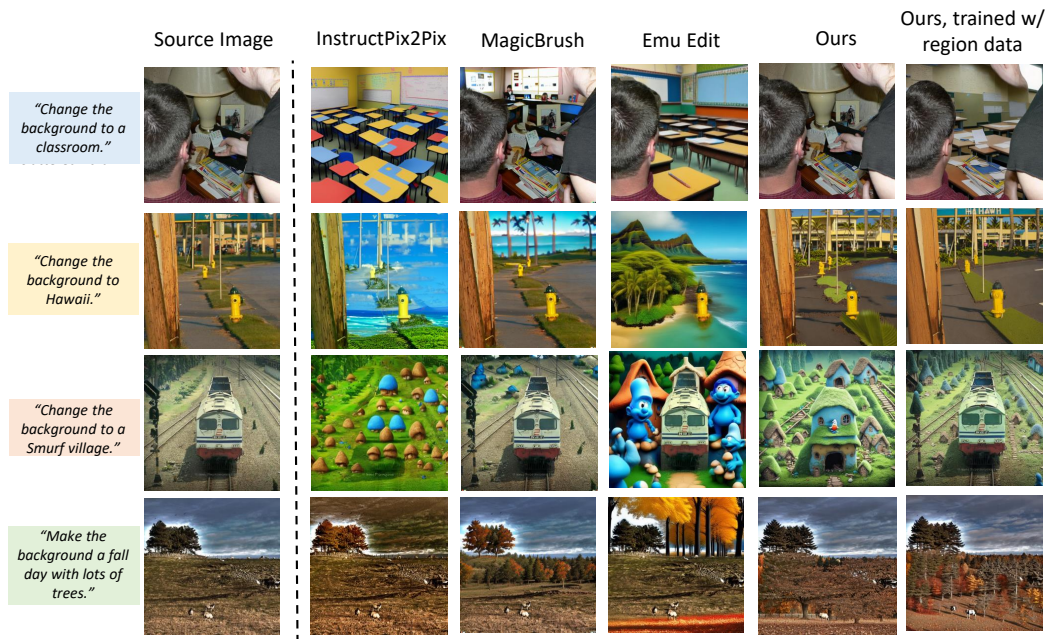

Figure 9: Qualitative evaluation comparing free-form and region-based editing task.

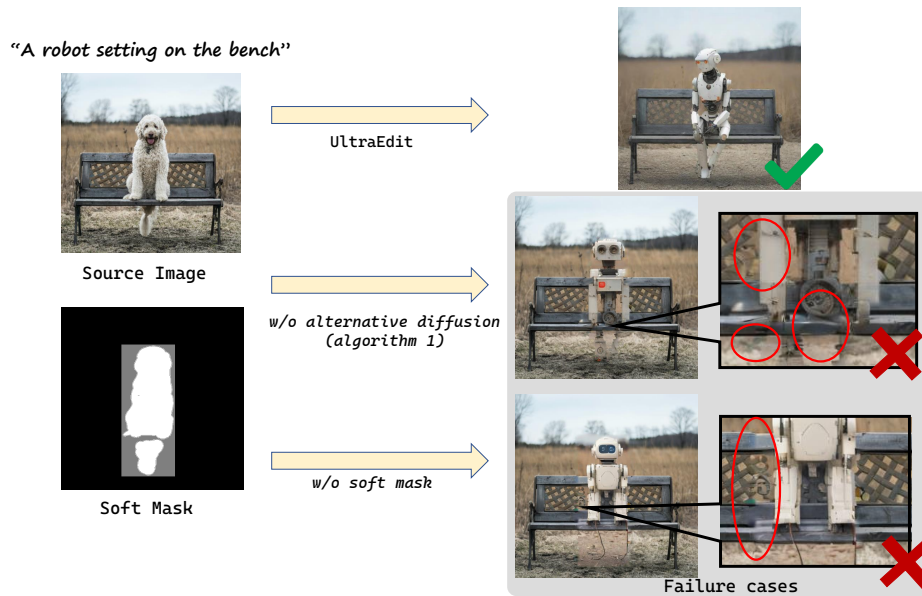

Figure 10: Qualitative evaluations of the region-based image editing pipeline. Generated images Without our method exhibit noticeable artifacts along the boundaries of the original and edited regions, emphasizing pronounced border effects.

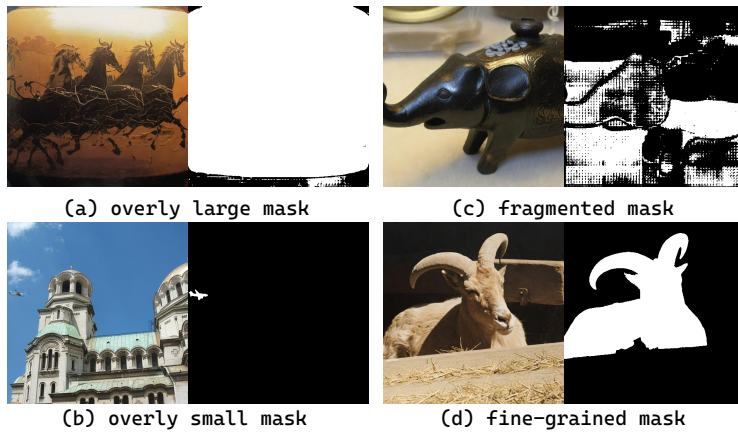

Figure 11: The four main categories of inaccuracies generated masks.

234 region and the remaining image. Qualitative evaluations shown in Figure 10 demonstrate the  
 235 effectiveness of our approach. Images generated without our method exhibit noticeable artifacts along  
 236 the boundaries of the original and edited regions, highlighting the advantages of our method.

## 237 **E Statement on Limitations and Ethical Concerns**

### 238 **E.1 Limitations**

239 While ULTRAEDIT represents a significant advancement in instruction-based image editing, several  
240 limitations should be acknowledged. Firstly, although our dataset includes diverse editing instructions  
241 and real image anchors, the reliance on automatically generated data may introduce some biases and  
242 errors. The quality and relevance of the editing instructions, influenced by current large language  
243 models and human raters, may not capture all nuances of creative and artistic editing tasks. Fur-  
244 thermore, despite our efforts to provide high-quality region annotations, there may be occasional  
245 inaccuracies or inconsistencies in the automatically produced region-based editing data.

246 Moreover, while our experiments demonstrate the benefits of using real image anchors and region-  
247 based editing data, the improvements shown by our diffusion-based editing baselines are benchmark-  
248 specific. They may not generalize across all editing scenarios. Future work should focus on enhancing  
249 the precision of region annotations and validating the dataset’s applicability across a broader range of  
250 editing tasks.

251 Despite these limitations, ULTRAEDIT offers a robust and diverse dataset that significantly contributes  
252 to the field of image editing, paving the way for future research and development.

### 253 **E.2 Ethical concerns**

254 While UltraEdit offers substantial advancements in the field of instruction-based image editing,  
255 several ethical concerns must be considered:

- 256 • **Bias and Fairness.** The dataset, while diverse thanks to the efforts on real image anchors, *etc.*, may  
257 still contain biases introduced by the automatic generation process and the inherent biases present  
258 in the large language models and human raters used. These biases could perpetuate stereotypes or  
259 unfair representations in the edited images.
- 260 • **Misinformation and Misuse.** The powerful image editing capabilities enabled by UltraEdit could  
261 be misused to create misleading or deceptive content, contributing to the spread of misinformation.  
262 It is crucial to implement safeguards and promote responsible use of the technology to mitigate this  
263 risk.
- 264 • **Privacy.** Real image anchors included in the dataset may contain identifiable information. Although  
265 efforts have been made to anonymize and protect personal data, there remains a risk of unintentional  
266 breaches of privacy.

267 To address these ethical concerns, we encourage users of UltraEdit to adhere to ethical guidelines,  
268 implement robust checks for bias and fairness, and prioritize transparency and accountability in their  
269 work. Additionally, we recommend ongoing dialogue within the research community to continuously  
270 refine and improve ethical standards in developing and applying image editing technologies.

## 271 **F Datasheet for ULTRAEDIT**

272 We present a Datasheet [8] for documentation and responsible usage of our internet knowledge  
273 databases. The required author statement, hosting, licensing, metadata, and maintenance plan can be  
274 found in the datasheet.

### 275 **F.1 Motivation**

276 **For what purpose was the dataset created?** We create this large-scale dataset to facilitate  
277 research towards image editing based on natural language instructions and regions (masks).

278 **Who created the dataset (e.g., which team, research group) and on behalf of which entity**  
279 **(e.g., company, institution, organization)?** This dataset was created by Haozhe Zhao (Peking

280 University), Xiaojian Ma (BIGAI), Liang Chen (Peking University), Shuzheng Si (Tsinghua  
281 University), Rujie Wu (Peking University), Kaikai An (Peking University), Peiyu Yu (UCLA), Minjia  
282 Zhang (UIUC), Qing Li (BIGAI), and Baobao Chang (Peking University).

## 283 F.2 Distribution

284 **Will the dataset be distributed to third parties outside of the entity (e.g., company, institution,  
285 organization) on behalf of which the dataset was created?** Yes, the dataset is publicly available  
286 on the internet.

287 **How will the dataset will be distributed (e.g., tarball on website, API, GitHub)?** All  
288 datasets can be downloaded from <https://huggingface.co/>. Please refer to this table of  
289 URL, DOI, and licensing. The Croissant metadata can be found on the dataset hosting platform  
290 (<https://huggingface.co/>).

| Dataset                     | DOI                                                             | License                                      |
|-----------------------------|-----------------------------------------------------------------|----------------------------------------------|
| ULTRAEDIT-full              | <a href="https://doi.org/10.57967/hf/2481">10.57967/hf/2481</a> | Creative Commons Attribution 4.0 (CC BY 4.0) |
| ULTRAEDIT-free-form-500k    | <a href="https://doi.org/10.57967/hf/2535">10.57967/hf/2535</a> | Creative Commons Attribution 4.0 (CC BY 4.0) |
| ULTRAEDIT-region-based-100k | <a href="https://doi.org/10.57967/hf/2534">10.57967/hf/2534</a> | Creative Commons Attribution 4.0 (CC BY 4.0) |

291 **Have any third parties imposed IP-based or other restrictions on the data associated with the  
292 instances?** No.

293 **Do any export controls or other regulatory restrictions apply to the dataset or to individual  
294 instances?** No.

## 295 F.3 Maintenance

296 **Who will be supporting/hosting/maintaining the dataset?** The authors will be supporting,  
297 hosting, and maintaining the dataset.

298 **How can the owner/curator/manager of the dataset be contacted (e.g., email address)?** Please  
299 contact Haozhe Zhao ([mimazhe55360@gmail.com](mailto:mimazhe55360@gmail.com)), Xiaojian Ma ([maxiaojian@bigai.ai](mailto:maxiaojian@bigai.ai)) and  
300 Qing Li ([liqing@bigai.ai](mailto:liqing@bigai.ai)).

301 **Is there an erratum?** No. We will make announcements if there is any.

302 **Will the dataset be updated (e.g., to correct labeling errors, add new instances, delete  
303 instances)?** Yes. New updates will be posted on <https://ultra-editing.github.io>.

304 **If the dataset relates to people, are there applicable limits on the retention of the data associated  
305 with the instances (e.g., were the individuals in question told that their data would be retained  
306 for a fixed period of time and then deleted)?** The images in our dataset might contain human  
307 subjects, but they are all synthetic.

308 **Will older versions of the dataset continue to be supported/hosted/maintained?** Yes, old  
309 versions will be permanently accessible on [huggingface.co](https://huggingface.co).

310 **If others want to extend/augment/build on/contribute to the dataset, is there a mechanism for  
311 them to do so?** Yes, please refer to <https://ultra-editing.github.io>.

## 312 F.4 Composition

313 **What do the instances that comprise the dataset represent?** Our data is generally stored in  
314 the Apache Parquet format, which is a table with multiple columns. We provide images (as source

315 images and target/edited images), captions of source and target images, editing instructions, objects  
316 to be edited, metrics (CLIPimg, DINOv2, SSIM, CLIPin, CLIPout, and CLIPdir), and editing regions  
317 (optional), as separate columns.

318 **How many instances are there in total (of each type, if appropriate)?** There are ~4M samples,  
319 among which ~100K are region-based editing data, while the rests are free-form editing data.

320 **Does the dataset contain all possible instances or is it a sample (not necessarily random) of**  
321 **instances from a larger set?** We provide all instances in our Huggingface data repositories.

322 **Is there a label or target associated with each instance?** No.

323 **Is any information missing from individual instances?** No.

324 **Are relationships between individual instances made explicit (e.g., users' movie ratings, social**  
325 **network links)?** No.

326 **Are there recommended data splits (e.g., training, development/validation, testing)?** No. The  
327 entire database is intended for training.

328 **Are there any errors, sources of noise, or redundancies in the dataset?** Please refer to  
329 Appendix E.

330 **Is the dataset self-contained, or does it link to or otherwise rely on external resources (e.g.,**  
331 **websites, tweets, other datasets)?** The dataset is self-contained.

332 **Does the dataset contain data that might be considered confidential?** No.

333 **Does the dataset contain data that, if viewed directly, might be offensive, insulting, threatening,**  
334 **or might otherwise cause anxiety?** We have made our best efforts to detoxify the contents via  
335 an automated procedure. Please refer to Sec. E.

## 336 **F.5 Collection Process**

337 The collection procedure, preprocessing, and cleaning are explained in detail in Section 2 of the main  
338 paper.

339 **Who was involved in the data collection process (e.g., students, crowdworkers, contractors) and**  
340 **how were they compensated (e.g., how much were crowdworkers paid)?** All data collection,  
341 curation, and filtering are done by ULTRAEDIT coauthors.

342 **Over what timeframe was the data collected?** The data was collected between Jan. 2024 and  
343 May 2024.

## 344 **F.6 Uses**

345 **Has the dataset been used for any tasks already?** Yes, we have used ULTRAEDIT for training  
346 our image edit models.

347 **What (other) tasks could the dataset be used for?** Our dataset is primarily for facilitating  
348 research in building more capable image editing models that follow natural language instructions  
349 and (optionally) editing region input. Our data might also be used to benchmark existing and future  
350 image editing models.

351 **Is there anything about the composition of the dataset or the way it was collected and**  
352 **preprocessed/cleaned/labeled that might impact future uses?** No.

353 **Are there tasks for which the dataset should not be used?** We strongly oppose any research  
354 that intentionally generates harmful or toxic content using our data.

## 355 References

- 356 [1] Harsh Agrawal, Karan Desai, Yufei Wang, Xinlei Chen, Rishabh Jain, Mark Johnson, Dhruv  
357 Batra, Devi Parikh, Stefan Lee, and Peter Anderson. nocaps: novel object captioning at scale.  
358 In *ICCV*, pages 8948–8957, 2019. 3
- 359 [2] Omri Avrahami, Dani Lischinski, and Ohad Fried. Blended diffusion for text-driven editing  
360 of natural images. In *IEEE/CVF Conference on Computer Vision and Pattern Recognition,*  
361 *CVPR 2022, New Orleans, LA, USA, June 18-24, 2022*, pages 18187–18197. IEEE, 2022. URL  
362 <https://doi.org/10.1109/CVPR52688.2022.01767>. 8
- 363 [3] Jeffrey P Bigham, Chandrika Jayant, Hanjie Ji, Greg Little, Andrew Miller, Robert C Miller,  
364 Robin Miller, Aubrey Tatarowicz, Brandyn White, Samuel White, et al. Vizwiz: nearly real-time  
365 answers to visual questions. In *Proceedings of the 23rd annual ACM symposium on User*  
366 *interface software and technology*, pages 333–342, 2010. 3
- 367 [4] Tim Brooks, Aleksander Holynski, and Alexei A Efros. Instructpix2pix: Learning to follow  
368 image editing instructions. In *Proceedings of the IEEE/CVF Conference on Computer Vision*  
369 *and Pattern Recognition*, pages 18392–18402, 2023. 5, 6, 8, 11, 12
- 370 [5] Lin Chen, Jinsong Li, Xiaoyi Dong, Pan Zhang, Conghui He, Jiaqi Wang, Feng Zhao, and  
371 Dahua Lin. Sharegpt4v: Improving large multi-modal models with better captions, 2023. 3
- 372 [6] Patrick Esser, Sumith Kulal, Andreas Blattmann, Rahim Entezari, Jonas Müller, Harry Saini,  
373 Yam Levi, Dominik Lorenz, Axel Sauer, Frederic Boesel, Dustin Podell, Tim Dockhorn, Zion  
374 English, Kyle Lacey, Alex Goodwin, Yannik Marek, and Robin Rombach. Scaling rectified  
375 flow transformers for high-resolution image synthesis, 2024. URL [https://arxiv.org/abs/](https://arxiv.org/abs/2403.03206)  
376 [2403.03206](https://arxiv.org/abs/2403.03206). 13
- 377 [7] Yue Fan, Xiaojian Ma, Rujie Wu, Yuntao Du, Jiaqi Li, Zhi Gao, and Qing Li. Videoagent:  
378 A memory-augmented multimodal agent for video understanding. In Aleš Leonardis, Elisa  
379 Ricci, Stefan Roth, Olga Russakovsky, Torsten Sattler, and Gül Varol, editors, *Computer Vision –*  
380 *ECCV 2024*, pages 75–92, Cham, 2025. Springer Nature Switzerland. ISBN 978-3-031-72670-5.  
381 3
- 382 [8] Timnit Gebru, Jamie Morgenstern, Briana Vecchione, Jennifer Wortman Vaughan, Hanna  
383 Wallach, Hal Daumé Iii, and Kate Crawford. Datasheets for datasets. *Communications of the*  
384 *ACM*, 64(12):86–92, 2021. 19
- 385 [9] Ralf Herbrich, Tom Minka, and Thore Graepel. Trueskill™: a bayesian skill rating system.  
386 *Advances in neural information processing systems*, 19, 2006. 11, 12, 13
- 387 [10] Amir Hertz, Ron Mokady, Jay Tenenbaum, Kfir Aberman, Yael Pritch, and Daniel Cohen-Or.  
388 Prompt-to-prompt image editing with cross attention control. *CoRR*, abs/2208.01626, 2022.  
389 URL <https://doi.org/10.48550/arXiv.2208.01626>. 10
- 390 [11] Sirui Hong, Mingchen Zhuge, Jonathan Chen, Xiawu Zheng, Yuheng Cheng, Ceyao Zhang,  
391 Jinlin Wang, Zili Wang, Steven Ka Shing Yau, Zijuan Lin, Liyang Zhou, Chenyu Ran, Lingfeng  
392 Xiao, Chenglin Wu, and Jürgen Schmidhuber. Metagpt: Meta programming for a multi-agent  
393 collaborative framework, 2023. URL <https://arxiv.org/abs/2308.00352>. 3

- 394 [12] Alexander Kirillov, Eric Mintun, Nikhila Ravi, Hanzi Mao, Chloe Rolland, Laura Gustafson,  
395 Tete Xiao, Spencer Whitehead, Alexander C. Berg, Wan-Yen Lo, Piotr Dollár, and Ross Girshick.  
396 Segment anything. *arXiv:2304.02643*, 2023. 4
- 397 [13] Pengxiang Li, Zhi Gao, Bofei Zhang, Tao Yuan, Yuwei Wu, Mehrtash Harandi, Yunde Jia,  
398 Song-Chun Zhu, and Qing Li. Fire: A dataset for feedback integration and refinement evaluation  
399 of multimodal models, 2024. URL <https://arxiv.org/abs/2407.11522>. 3
- 400 [14] Yunshui Li, Binyuan Hui, Xiaobo Xia, Jiayi Yang, Min Yang, Lei Zhang, Shuzheng Si, Ling-  
401 Hao Chen, Junhao Liu, Tongliang Liu, Fei Huang, and Yongbin Li. One-shot learning as  
402 instruction data prospector for large language models, 2024. URL [https://arxiv.org/abs/](https://arxiv.org/abs/2312.10302)  
403 [2312.10302](https://arxiv.org/abs/2312.10302). 3
- 404 [15] Tsung-Yi Lin, Michael Maire, Serge J. Belongie, James Hays, Pietro Perona, Deva Ramanan,  
405 Piotr Dollár, and C. Lawrence Zitnick. Microsoft COCO: common objects in context. In  
406 *Computer Vision - ECCV 2014 - 13th European Conference, Zurich, Switzerland, September*  
407 *6-12, 2014, Proceedings, Part V*, volume 8693 of *Lecture Notes in Computer Science*, pages  
408 740–755. Springer, 2014. URL [https://doi.org/10.1007/978-3-319-10602-1\\_48](https://doi.org/10.1007/978-3-319-10602-1_48). 3
- 409 [16] Shilong Liu, Zhaoyang Zeng, Tianhe Ren, Feng Li, Hao Zhang, Jie Yang, Chunyuan Li, Jianwei  
410 Yang, Hang Su, Jun Zhu, et al. Grounding dino: Marrying dino with grounded pre-training for  
411 open-set object detection. *arXiv preprint arXiv:2303.05499*, 2023. 4
- 412 [17] Chenlin Meng, Yutong He, Yang Song, Jiaming Song, Jiajun Wu, Jun-Yan Zhu, and Stefano  
413 Ermon. SDEdit: Guided image synthesis and editing with stochastic differential equations. In  
414 *International Conference on Learning Representations*, 2022. URL [https://openreview.](https://openreview.net/forum?id=aBsCjcPu_tE)  
415 [net/forum?id=aBsCjcPu\\_tE](https://openreview.net/forum?id=aBsCjcPu_tE). 8
- 416 [18] Ron Mokady, Amir Hertz, Kfir Aberman, Yael Pritch, and Daniel Cohen-Or. Null-text inversion  
417 for editing real images using guided diffusion models. In *Proceedings of the IEEE/CVF*  
418 *Conference on Computer Vision and Pattern Recognition*, pages 6038–6047, 2023. 8
- 419 [19] Alexander Quinn Nichol, Prafulla Dhariwal, Aditya Ramesh, Pranav Shyam, Pamela Mishkin,  
420 Bob McGrew, Ilya Sutskever, and Mark Chen. GLIDE: towards photorealistic image generation  
421 and editing with text-guided diffusion models. In *International Conference on Machine Learning,*  
422 *ICML 2022, 17-23 July 2022, Baltimore, Maryland, USA*, volume 162 of *Proceedings of*  
423 *Machine Learning Research*, pages 16784–16804. PMLR, 2022. URL [https://proceedings.](https://proceedings.mlr.press/v162/nichol22a.html)  
424 [mlr.press/v162/nichol22a.html](https://proceedings.mlr.press/v162/nichol22a.html). 8
- 425 [20] Dustin Podell, Zion English, Kyle Lacey, Andreas Blattmann, Tim Dockhorn, Jonas Müller, Joe  
426 Penna, and Robin Rombach. Sdxl: Improving latent diffusion models for high-resolution image  
427 synthesis, 2023. 13
- 428 [21] Jordi Pont-Tuset, Jasper Uijlings, Soravit Changpinyo, Radu Soricut, and Vittorio Ferrari.  
429 Connecting vision and language with localized narratives. In *ECCV*, 2020. 3
- 430 [22] Aditya Ramesh, Prafulla Dhariwal, Alex Nichol, Casey Chu, and Mark Chen. Hierarchical  
431 text-conditional image generation with CLIP latents. *CoRR*, abs/2204.06125, 2022. URL  
432 <https://doi.org/10.48550/arXiv.2204.06125>. 11
- 433 [23] Robin Rombach, Andreas Blattmann, Dominik Lorenz, Patrick Esser, and Björn Ommer. High-  
434 resolution image synthesis with latent diffusion models. In *Proceedings of the IEEE/CVF*  
435 *Conference on Computer Vision and Pattern Recognition (CVPR)*, pages 10684–10695, June  
436 2022. 5
- 437 [24] Robin Rombach, Andreas Blattmann, Dominik Lorenz, Patrick Esser, and Björn Ommer. High-  
438 resolution image synthesis with latent diffusion models. In *Proceedings of the IEEE/CVF*  
439 *Conference on Computer Vision and Pattern Recognition (CVPR)*, pages 10684–10695, June  
440 2022. 8, 13

- 441 [25] Timo Schick, Jane Dwivedi-Yu, Roberto Dessì, Roberta Raileanu, Maria Lomeli, Eric Hambro,  
442 Luke Zettlemoyer, Nicola Cancedda, and Thomas Scialom. Toolformer: Language models can  
443 teach themselves to use tools. *Advances in Neural Information Processing Systems*, 36, 2024. 3
- 444 [26] Christoph Schuhmann and Peter Bevan. 220k-gpt4vision-captions-from-lvis. [https://](https://huggingface.co/datasets/laion/220k-GPT4Vision-captions-from-LIVIS)  
445 [huggingface.co/datasets/laion/220k-GPT4Vision-captions-from-LIVIS](https://huggingface.co/datasets/laion/220k-GPT4Vision-captions-from-LIVIS), 2023.  
446 3
- 447 [27] Shelly Sheynin, Adam Polyak, Uriel Singer, Yuval Kirstain, Amit Zohar, Oron Ashual, Devi  
448 Parikh, and Yaniv Taigman. Emu edit: Precise image editing via recognition and generation  
449 tasks. *arXiv preprint arXiv:2311.10089*, 2023. 8, 11, 12, 13
- 450 [28] Shuzheng Si, Wentao Ma, Haoyu Gao, Yuchuan Wu, Ting-En Lin, Yinpei Dai, Hangyu Li, Rui  
451 Yan, Fei Huang, and Yongbin Li. Spokenwoz: A large-scale speech-text benchmark for spoken  
452 task-oriented dialogue agents, 2024. URL <https://arxiv.org/abs/2305.13040>. 3
- 453 [29] Oleksii Sidorov, Ronghang Hu, Marcus Rohrbach, and Amanpreet Singh. Textcaps: a dataset  
454 for image captioning with reading comprehension, 2020. 3
- 455 [30] Jiaming Song, Chenlin Meng, and Stefano Ermon. Denoising diffusion implicit models. In  
456 *9th International Conference on Learning Representations, ICLR 2021, Virtual Event, Aus-*  
457 *tria, May 3-7, 2021*. OpenReview.net, 2021. URL [https://openreview.net/forum?id=](https://openreview.net/forum?id=St1giarCHLP)  
458 [St1giarCHLP](https://openreview.net/forum?id=St1giarCHLP). 10
- 459 [31] Patrick von Platen, Suraj Patil, Anton Lozhkov, Pedro Cuenca, Nathan Lambert, Kashif Rasul,  
460 Mishig Davaadorj, Dhruv Nair, Sayak Paul, William Berman, Yiyi Xu, Steven Liu, and Thomas  
461 Wolf. Diffusers: State-of-the-art diffusion models. [https://github.com/huggingface/](https://github.com/huggingface/diffusers)  
462 [diffusers](https://github.com/huggingface/diffusers), 2022. 5
- 463 [32] Peter Young, Alice Lai, Micah Hodosh, and Julia Hockenmaier. From image descriptions  
464 to visual denotations: New similarity metrics for semantic inference over event descriptions.  
465 *Transactions of the Association for Computational Linguistics*, 2, 2014. 3
- 466 [33] Kai Zhang, Lingbo Mo, Wenhua Chen, Huan Sun, and Yu Su. Magicbrush: A manually annotated  
467 dataset for instruction-guided image editing. *Advances in Neural Information Processing*  
468 *Systems*, 36, 2024. 3, 5, 8, 11, 12
- 469 [34] Shu Zhang, Xinyi Yang, Yihao Feng, Can Qin, Chia-Chih Chen, Ning Yu, Zeyuan Chen, Huan  
470 Wang, Silvio Savarese, Stefano Ermon, et al. Hive: Harnessing human feedback for instructional  
471 visual editing. *arXiv preprint arXiv:2303.09618*, 2023. 8
- 472 [35] Youcai Zhang, Xinyu Huang, Jinyu Ma, Zhaoyang Li, Zhaochuan Luo, Yanchun Xie, Yuzhuo  
473 Qin, Tong Luo, Yaqian Li, Shilong Liu, et al. Recognize anything: A strong image tagging  
474 model. *arXiv preprint arXiv:2306.03514*, 2023. 3
- 475 [36] Haozhe Zhao, Zefan Cai, Shuzheng Si, Xiaojuan Ma, Kaikai An, Liang Chen, Zixuan Liu, Sheng  
476 Wang, Wenjuan Han, and Baobao Chang. Mmicl: Empowering vision-language model with  
477 multi-modal in-context learning. *arXiv preprint arXiv:2309.07915*, 2023. 3
